# Supplementary material for: Mutational analysis of two residues in the DYRK homology box of the protein kinase DYRK1A
Source: PubMed Central journal article supplement (PMC5952693; doi:10.1186/s13104-018-3416-4), 2018-05-15
Supplement: 13104_2018_3416_MOESM1_ESM.pdf [file 13104_2018_3416_MOESM1_ESM.pdf]

## Additional file 1

### Expression plasmid for bacterial expression of DYRK1A<sub>28-499</sub>

The cDNA sequence encoding amino acids 28-499 of rat DYRK1A (Reference sequence acc. NM\_012791.3) was inserted between the *NheI* and *EcoRI* sites of the expression plasmid pET-ST2 (Walte et al. 2013) to create an N-terminal fusion with the Strep-tag 2 sequence.

StrepTag2  
MA**WSHPQFEK** NMSHMASLQM AAQMPHSHQY SDRRQPNISD QQVSALSYSYD QIQQPLTNQV  
MPDIVMLQRR MPQTFRDPAT APLRKLSVDL IKTYKHINEV YYAKKKRRHQ QGQGDSSHK  
KERKVV**LD**GY **DDDNYDYIVK** NGEKWMDRYE IDSLIGKGSF GQVVKAYDRV EQEWVAIKII  
KNKKAFLNQA QIEVRLLELM NKHDTEMKYY IVHLKRHFMM RNHLCLVFEM LSYNLYDLLR  
NTNFRGVSLN LTRKFAQQMC TALLFLATPE LSIIHCDLKP ENII**L**CNPKR SAIKIVDFGS  
SCQLGQRIYQ **Y**LQSRFYRSP EVLLGMPYDL AIDMWSLGCI LVEMHTGEPL FSGANEVDQM  
NKIVEVLGIP PAHILDQAPK ARKFFFEKLPD GTWSLKKTKD GKREYKPPGT RKLHNILGVE  
TGGPGRRAG ESGHTVADYL KFKDLILRML DYDPKTRIQP YYALQHSFFK KTADEGTNTS  
NSVSTSPAM

### Amino acid sequence of the ST2-DYRK1A<sub>28-499</sub> fusion protein

The N-terminal StrepTag2 sequence and the DH box are boxed. The catalytic domain is underlined. The amino acids targeted by the mutant constructs in Fig. 3 are marked by blue circles and the autophosphorylated Y321 by a red circle.

Calculated molecular mass: 57 kD.
